# Supplementary material
Source: Springer Nature journal article supplement (https://www.springermedizin.de/resource/supplementary/12883_2012_622_MOESM1_ESM.pdf/9455838)
Supplement: MOESM1 [file 9455838]

Included  
n=187

Test 1  
n=180

Dropouts n=7

Test 2  
n=158

Dropouts n=22

Test 3  
n=153

Dropouts n=5

Test 4  
n=146

MMSE sum score  
at test 1, n=146  
 $23.36 \pm 4.44$

Dropouts n=7

Sum dropouts  
Test 1 to test 4 n=34

MMSE sum score at  
test 1, n=34  
 $22.16 \pm 4.47$
